# Supplementary material for: Investigating causality in the association between 25(OH)D and schizophrenia
Source: PubMed Central journal article supplement (PMC4877705; doi:10.1038/srep26496), 2016-05-24
Supplement: srep26496-s1.pdf [file srep26496-s1.pdf]

## **Investigating causality in the association between 25(OH)D and schizophrenia**

Amy E. Taylor PhD<sup>1,2,3</sup>, Stephen Burgess PhD<sup>1,4</sup>, Jennifer J. Ware PhD<sup>1,2,5</sup>, Suzanne H. Gage PhD<sup>1,2,3</sup>, SUNLIGHT consortium, J. Brent. Richards PhD<sup>6,7,8</sup>, George Davey Smith MD<sup>1,5</sup>, Marcus R. Munafò PhD<sup>1,2,3</sup>

1. MRC Integrative Epidemiology Unit (IEU) at the University of Bristol, UK
2. UK Centre for Tobacco and Alcohol Studies, University of Bristol, UK
3. School of Experimental Psychology, University of Bristol, UK
4. Department of Public Health and Primary Care, University of Cambridge, UK
5. School of Social and Community Medicine, University of Bristol, UK
6. Centre for Clinical Epidemiology, Lady Davis Institute for Medical Research, Jewish General Hospital, McGill University, Canada
7. Department of Medicine, McGill University, Canada
8. Department of Twin Research, King's College London, UK

**Table S1. Association of vitamin D related genetic variants with 25(OH)D**

| SNP        | Chr | Gene           | Pathway    | Alleles (minor/major) | Minor allele frequency | Effect per minor allele (% change in 25(OH)D)* | Standard error |
|------------|-----|----------------|------------|-----------------------|------------------------|------------------------------------------------|----------------|
| rs2282679  | 4   | <i>GC</i>      | metabolism | G/T                   | 0.26                   | -8.45                                          | 0.31           |
| rs10741657 | 11  | <i>CYP2R1</i>  | synthesis  | A/G                   | 0.40                   | 3.12                                           | 0.29           |
| rs12785878 | 11  | <i>DHCR7</i>   | synthesis  | G/T                   | 0.22                   | -3.70                                          | 0.30           |
| rs6013897  | 20  | <i>CYP24A1</i> | metabolism | A/T                   | 0.20                   | -1.85                                          | 0.33           |

SE: standard error; \*Effect sizes and standard errors taken from Vimalleswaran et al. <sup>1</sup>

1 Vimalleswaran, K. S. *et al.* Causal relationship between obesity and vitamin D status: bi-directional Mendelian randomization analysis of multiple cohorts. *PLoS medicine* **10**, e1001383, doi:10.1371/journal.pmed.1001383 (2013).

**Table S2. Association of vitamin D related genetic variants with schizophrenia in the PGC Schizophrenia GWAS**

| SNP        | Chr | Gene           | Effect allele | OR for schizophrenia per effect allele | Standard Error |
|------------|-----|----------------|---------------|----------------------------------------|----------------|
| rs2282679  | 4   | <i>GC</i>      | T             | 0.9973                                 | 0.0117         |
| rs10741657 | 11  | <i>CYP2R1</i>  | A             | 0.97775                                | 0.0108         |
| rs12785878 | 11  | <i>DHCR7</i>   | T             | 1.0143                                 | 0.0118         |
| rs6013897  | 20  | <i>CYP24A1</i> | A             | 1.02163                                | 0.0130         |

Data available to download from: <http://www.med.unc.edu/pgc/downloads>

**Table S3. Associations of schizophrenia related SNPs included in the analysis with schizophrenia in the PGC**

| SNP        | Chromosome | A1A2 <sup>1</sup> | EAF <sup>2</sup> | Odds ratio | Standard error |
|------------|------------|-------------------|------------------|------------|----------------|
| rs4648845  | 1          | TC                | 0.533            | 1.07144    | 0.0117         |
| rs1498232  | 1          | TC                | 0.311            | 1.0724     | 0.0115         |
| rs11210892 | 1          | AG                | 0.659            | 0.93286    | 0.0112         |
| rs12129573 | 1          | AC                | 0.377            | 1.07186    | 0.011          |
| rs1702294  | 1          | TC                | 0.175            | 0.89074    | 0.0137         |
| rs6670165  | 1          | TC                | 0.196            | 1.0739     | 0.0135         |
| rs7523273  | 1          | AG                | 0.695            | 1.06194    | 0.0115         |
| rs10803138 | 1          | AG                | 0.232            | 0.93165    | 0.0126         |
| rs14403    | 1          | TC                | 0.207            | 0.93454    | 0.0128         |
| rs11682175 | 2          | TC                | 0.52             | 0.92849    | 0.0106         |
| rs75575209 | 2          | AT                | 0.904            | 0.89583    | 0.0192         |
| rs3768644  | 2          | AG                | 0.0967           | 0.91037    | 0.0178         |
| rs2909457  | 2          | AG                | 0.568            | 0.94271    | 0.0108         |
| rs59979824 | 2          | AC                | 0.322            | 0.93576    | 0.0116         |
| rs6704641  | 2          | AG                | 0.819            | 1.07918    | 0.0138         |
| rs6704768  | 2          | AG                | 0.54             | 0.92886    | 0.0106         |
| rs17194490 | 3          | TG                | 0.169            | 1.10197    | 0.0148         |
| rs4330281  | 3          | TC                | 0.479            | 0.9428     | 0.0108         |
| rs2535627  | 3          | TC                | 0.545            | 1.07272    | 0.0106         |
| rs832187   | 3          | TC                | 0.607            | 0.94111    | 0.0109         |
| rs7432375  | 3          | AG                | 0.421            | 0.93109    | 0.0109         |
| rs9841616  | 3          | AT                | 0.158            | 0.92247    | 0.0143         |
| rs215411   | 4          | AT                | 0.331            | 1.06695    | 0.0114         |
| rs10520163 | 4          | TC                | 0.493            | 1.06279    | 0.0106         |
| rs1106568  | 4          | AG                | 0.747            | 0.93295    | 0.0122         |
| rs1501357  | 5          | TC                | 0.794            | 0.92635    | 0.0134         |
| rs4391122  | 5          | AG                | 0.505            | 0.92413    | 0.0107         |
| rs16867576 | 5          | AG                | 0.889            | 1.10054    | 0.0169         |
| rs4388249  | 5          | TC                | 0.212            | 1.07466    | 0.0135         |
| rs10043984 | 5          | TC                | 0.266            | 1.0694     | 0.012          |
| rs3849046  | 5          | TC                | 0.542            | 1.06471    | 0.0107         |
| rs79212538 | 5          | TG                | 0.0512           | 1.15165    | 0.0257         |
| rs12522290 | 5          | CG                | 0.84             | 1.08556    | 0.0147         |
| rs1339227  | 6          | TC                | 0.347            | 0.94186    | 0.0111         |
| rs6466055  | 7          | AC                | 0.35             | 1.06833    | 0.0111         |
| rs211829   | 7          | TC                | 0.641            | 1.05665    | 0.011          |
| rs13240464 | 7          | TC                | 0.667            | 1.08394    | 0.0112         |
| rs7801375  | 7          | AG                | 0.146            | 0.92035    | 0.0148         |
| rs3735025  | 7          | TC                | 0.657            | 1.06577    | 0.011          |
| rs10503253 | 8          | AC                | 0.223            | 1.07347    | 0.0127         |
| rs6984242  | 8          | AG                | 0.586            | 0.93763    | 0.0107         |

|            |    |    |        |         |        |
|------------|----|----|--------|---------|--------|
| rs36068923 | 8  | AG | 0.787  | 0.91943 | 0.013  |
| rs4129585  | 8  | AC | 0.447  | 1.08156 | 0.0107 |
| rs11139497 | 9  | AT | 0.346  | 1.07037 | 0.0115 |
| rs7893279  | 10 | TG | 0.899  | 1.11974 | 0.0171 |
| rs55833108 | 10 | TG | 0.208  | 1.07842 | 0.0133 |
| rs11027857 | 11 | AG | 0.515  | 1.0646  | 0.0106 |
| rs9420     | 11 | AG | 0.327  | 1.0629  | 0.0113 |
| rs12421382 | 11 | TC | 0.318  | 0.94261 | 0.0113 |
| rs2514218  | 11 | TC | 0.31   | 0.93034 | 0.0116 |
| rs77502336 | 11 | CG | 0.337  | 1.07079 | 0.0114 |
| rs10791097 | 11 | TG | 0.479  | 1.0767  | 0.0106 |
| rs75059851 | 11 | AG | 0.812  | 1.09615 | 0.0135 |
| rs2007044  | 12 | AG | 0.602  | 0.91247 | 0.0108 |
| rs2239063  | 12 | AC | 0.729  | 1.07144 | 0.0118 |
| rs679087   | 12 | AC | 0.324  | 0.94073 | 0.0113 |
| rs4240748  | 12 | CG | 0.358  | 0.94261 | 0.0111 |
| rs10860964 | 12 | TC | 0.65   | 1.06056 | 0.011  |
| rs2851447  | 12 | CG | 0.723  | 0.91302 | 0.0119 |
| rs2068012  | 14 | TC | 0.76   | 0.93333 | 0.0126 |
| rs2693698  | 14 | AG | 0.412  | 0.93894 | 0.0111 |
| rs12903146 | 15 | AG | 0.544  | 1.06695 | 0.0106 |
| rs12148337 | 15 | TC | 0.478  | 1.05908 | 0.0105 |
| rs8042374  | 15 | AG | 0.75   | 1.09144 | 0.0124 |
| rs950169   | 15 | TC | 0.247  | 0.92386 | 0.0122 |
| rs4702     | 15 | AG | 0.547  | 0.92459 | 0.0112 |
| rs9922678  | 16 | AG | 0.299  | 1.06962 | 0.0116 |
| rs7405404  | 16 | TC | 0.238  | 1.08145 | 0.0125 |
| rs12325245 | 16 | AT | 0.849  | 0.91631 | 0.0153 |
| rs8044995  | 16 | AG | 0.173  | 1.0808  | 0.0141 |
| rs4523957  | 17 | TG | 0.642  | 1.07069 | 0.0112 |
| rs78322266 | 18 | TG | 0.0345 | 1.19363 | 0.031  |
| rs9636107  | 18 | AG | 0.49   | 0.92663 | 0.0107 |
| rs72934570 | 18 | TC | 0.0701 | 0.86528 | 0.0208 |
| rs715170   | 18 | TC | 0.261  | 0.93594 | 0.012  |
| rs2905426  | 19 | TG | 0.611  | 0.93725 | 0.0112 |
| rs2053079  | 19 | AG | 0.755  | 0.92932 | 0.0124 |
| rs56873913 | 19 | TG | 0.775  | 1.0693  | 0.0129 |
| rs6065094  | 20 | AG | 0.307  | 0.92849 | 0.0113 |
| rs7267348  | 20 | TC | 0.741  | 0.93782 | 0.0121 |
| rs1023500  | 22 | TC | 0.817  | 1.07638 | 0.0135 |

1. A1 is the effect allele; 2. EAF: effect allele frequency.

**Table S4. Associations of schizophrenia related SNPs included in the analysis with vitamin D levels in SUNLIGHT**

| SNP        | Proxy <sup>1</sup> | R <sup>2</sup> | N (SUNLIGHT) | p-value  | z-score <sup>3</sup> | EAF <sup>4</sup> | Beta <sup>5</sup> | Standard error <sup>6</sup> |
|------------|--------------------|----------------|--------------|----------|----------------------|------------------|-------------------|-----------------------------|
| rs4648845  |                    |                | 3627         | 0.7108   | 0.371                | 0.4789           | 0.0123            | 0.0332                      |
| rs1498232  | rs267700           | 1              | 16100        | 0.6082   | -0.513               | 0.2978           | -0.0088           | 0.0172                      |
| rs11210892 |                    |                | 15951        | 0.7922   | 0.263                | 0.6705           | 0.0044            | 0.0168                      |
| rs12129573 | rs12144370         | 0.965          | 13989        | 0.7614   | 0.304                | 0.3847           | 0.0053            | 0.0174                      |
| rs1702294  | rs2660304          | 1              | 14028        | 0.5428   | -0.609               | 0.1863           | -0.0132           | 0.0217                      |
| rs6670165  |                    |                | 14042        | 0.7954   | -0.259               | 0.1908           | -0.0056           | 0.0215                      |
| rs7523273  | rs7541230          | 1              | 14039        | 0.2156   | -1.238               | 0.6757           | -0.0223           | 0.0180                      |
| rs10803138 |                    |                | 13978        | 0.5527   | 0.594                | 0.253            | 0.0116            | 0.0195                      |
| rs14403    | rs884328           | 0.913          | 14039        | 0.3299   | -0.974               | 0.2253           | -0.0197           | 0.0202                      |
| rs11682175 |                    |                | 16121        | 0.7103   | 0.371                | 0.5193           | 0.0058            | 0.0158                      |
| rs75575209 | rs17049152         | 1              | 14045        | 0.1016   | -1.637               | 0.8972           | -0.0455           | 0.0278                      |
| rs3768644  | rs3768641          | 0.915          | 11060        | 0.7347   | -0.339               | 0.0975           | -0.0109           | 0.0321                      |
| rs2909457  | rs4664442          | 0.934          | 16081        | 0.1886   | -1.315               | 0.5374           | -0.0208           | 0.0158                      |
| rs59979824 | rs12619354         | 0.903          | 11714        | 0.5366   | 0.618                | 0.3675           | 0.0118            | 0.0192                      |
| rs6704641  |                    |                | 11829        | 0.619    | 0.497                | 0.8089           | 0.0116            | 0.0234                      |
| rs6704768  |                    |                | 13945        | 0.6705   | -0.426               | 0.5682           | -0.0073           | 0.0171                      |
| rs17194490 |                    |                | 13970        | 0.7308   | -0.344               | 0.1695           | -0.0078           | 0.0226                      |
| rs4330281  | rs4243834          | 0.967          | 16096        | 0.8168   | -0.232               | 0.4555           | -0.0037           | 0.0158                      |
| rs2535627  |                    |                | 16115        | 0.8083   | 0.243                | 0.5367           | 0.0038            | 0.0158                      |
| rs832187   |                    |                | 11833        | 0.09064  | -1.692               | 0.637            | -0.0323           | 0.0191                      |
| rs7432375  |                    |                | 16100        | 0.5728   | 0.564                | 0.3908           | 0.0091            | 0.0162                      |
| rs9841616  |                    |                | 14048        | 0.006996 | -2.697               | 0.1764           | -0.0597           | 0.0221                      |
| rs215411   |                    |                | 14025        | 0.7449   | 0.325                | 0.3215           | 0.0059            | 0.0181                      |
| rs10520163 |                    |                | 16123        | 0.9361   | 0.08                 | 0.4982           | 0.0013            | 0.0158                      |
| rs1106568  |                    |                | 16061        | 0.1966   | 1.291                | 0.7577           | 0.0238            | 0.0184                      |
| rs1501357  |                    |                | 16120        | 0.6649   | -0.433               | 0.8174           | -0.0088           | 0.0204                      |
| rs4391122  |                    |                | 11829        | 0.1111   | -1.593               | 0.5151           | -0.0293           | 0.0184                      |
| rs16867576 |                    |                | 13935        | 0.6808   | -0.411               | 0.8715           | -0.0104           | 0.0253                      |
| rs4388249  |                    |                | 13652        | 0.3069   | 1.022                | 0.157            | 0.0240            | 0.0235                      |
| rs10043984 | rs3798149          | 1              | 16121        | 0.3689   | -0.899               | 0.2707           | -0.0159           | 0.0177                      |
| rs3849046  |                    |                | 16037        | 0.9818   | 0.023                | 0.5347           | 0.0004            | 0.0158                      |
| rs79212538 | rs4133347          | 1              | 13995        | 0.4312   | 0.787                | 0.0459           | 0.0318            | 0.0404                      |
| rs12522290 |                    |                | 11896        | 0.1867   | -1.32                | 0.8092           | -0.0308           | 0.0233                      |
| rs1339227  |                    |                | 11878        | 0.761    | 0.304                | 0.3287           | 0.0059            | 0.0195                      |
| rs6466055  | rs2057883          | 0.932          | 14024        | 0.1272   | 1.525                | 0.3526           | 0.0270            | 0.0177                      |
| rs211829   |                    |                | 14015        | 0.1707   | 1.37                 | 0.6271           | 0.0239            | 0.0175                      |
| rs13240464 | rs38752            | 1              | 16115        | 0.8176   | 0.231                | 0.6543           | 0.0038            | 0.0166                      |
| rs7801375  |                    |                | 14046        | 0.5881   | -0.542               | 0.1575           | -0.0126           | 0.0232                      |
| rs3735025  | rs12540417         | 1              | 14024        | 0.4342   | 0.782                | 0.6308           | 0.0137            | 0.0175                      |
| rs10503253 |                    |                | 16121        | 0.5243   | 0.637                | 0.1928           | 0.0127            | 0.0200                      |
| rs6984242  | rs867743           | 0.962          | 16123        | 0.2244   | -1.215               | 0.5882           | -0.0194           | 0.0160                      |

|            |            |       |       |         |        |        |         |        |
|------------|------------|-------|-------|---------|--------|--------|---------|--------|
| rs36068923 | rs13267290 | 0.943 | 16124 | 0.1943  | -1.298 | 0.7925 | -0.0252 | 0.0194 |
| rs4129585  |            |       | 16112 | 0.2105  | -1.252 | 0.4359 | -0.0199 | 0.0159 |
| rs11139497 |            |       | 11853 | 0.09111 | -1.69  | 0.3204 | -0.0333 | 0.0197 |
| rs7893279  |            |       | 16118 | 0.2145  | -1.241 | 0.8846 | -0.0306 | 0.0247 |
| rs55833108 | rs2274341  | 0.955 | 14017 | 0.2873  | 1.064  | 0.2332 | 0.0213  | 0.0200 |
| rs11027857 |            |       | 13940 | 0.728   | -0.348 | 0.5203 | -0.0059 | 0.0170 |
| rs9420     |            |       | 16123 | 0.2872  | -1.064 | 0.3228 | -0.0179 | 0.0168 |
| rs12421382 |            |       | 11060 | 0.7766  | 0.284  | 0.3138 | 0.0058  | 0.0205 |
| rs2514218  |            |       | 11844 | 0.5229  | -0.639 | 0.3595 | -0.0122 | 0.0191 |
| rs77502336 | rs7927176  | 0.957 | 13968 | 0.02921 | 2.181  | 0.3257 | 0.0394  | 0.0181 |
| rs10791097 |            |       | 11895 | 0.9085  | 0.115  | 0.4802 | 0.0021  | 0.0184 |
| rs75059851 | rs3802924  | 1     | 13969 | 0.681   | -0.411 | 0.8038 | -0.0088 | 0.0213 |
| rs2007044  |            |       | 16122 | 0.9827  | 0.022  | 0.619  | 0.0004  | 0.0162 |
| rs2239063  |            |       | 11830 | 0.07028 | 1.81   | 0.7154 | 0.0369  | 0.0204 |
| rs679087   | rs302321   | 1     | 16122 | 0.01359 | -2.468 | 0.3485 | -0.0408 | 0.0165 |
| rs4240748  |            |       | 11859 | 0.8458  | 0.195  | 0.3738 | 0.0037  | 0.0190 |
| rs10860964 |            |       | 14032 | 0.3704  | -0.896 | 0.6265 | -0.0156 | 0.0175 |
| rs2851447  |            |       | 11891 | 0.2399  | -1.175 | 0.7615 | -0.0253 | 0.0215 |
| rs2068012  |            |       | 11854 | 0.361   | 0.913  | 0.7717 | 0.0200  | 0.0219 |
| rs2693698  |            |       | 16123 | 0.0873  | -1.71  | 0.4564 | -0.0270 | 0.0158 |
| rs12903146 | rs2414716  | 0.967 | 16123 | 0.6669  | -0.43  | 0.5431 | -0.0068 | 0.0158 |
| rs12148337 |            |       | 13991 | 0.567   | -0.572 | 0.4545 | -0.0097 | 0.0170 |
| rs8042374  |            |       | 16069 | 0.733   | -0.341 | 0.7707 | -0.0064 | 0.0188 |
| rs950169   |            |       | 16116 | 0.2078  | 1.26   | 0.2777 | 0.0222  | 0.0176 |
| rs4702     |            |       | 16122 | 0.5442  | -0.607 | 0.5822 | -0.0097 | 0.0160 |
| rs9922678  |            |       | 13974 | 0.4272  | -0.794 | 0.2923 | -0.0148 | 0.0186 |
| rs7405404  | rs7185124  | 1     | 16087 | 0.5022  | 0.671  | 0.2302 | 0.0126  | 0.0187 |
| rs12325245 |            |       | 13912 | 0.5584  | -0.585 | 0.8391 | -0.0135 | 0.0231 |
| rs8044995  |            |       | 14043 | 0.6047  | 0.518  | 0.1641 | 0.0118  | 0.0228 |
| rs4523957  |            |       | 11819 | 0.2791  | 1.082  | 0.6263 | 0.0206  | 0.0190 |
| rs78322266 | rs17594721 | 1     | 16122 | 0.5205  | 0.643  | 0.0324 | 0.0286  | 0.0445 |
| rs9636107  |            |       | 13988 | 0.5145  | 0.652  | 0.5205 | 0.0110  | 0.0169 |
| rs72934570 | rs9945732  | 1     | 16119 | 0.3333  | -0.968 | 0.0629 | -0.0314 | 0.0324 |
| rs715170   |            |       | 13982 | 0.9896  | -0.013 | 0.2682 | -0.0002 | 0.0191 |
| rs2905426  | rs1469712  | 1     | 14039 | 0.7268  | 0.349  | 0.6426 | 0.0061  | 0.0176 |
| rs2053079  |            |       | 13993 | 0.4972  | 0.679  | 0.7538 | 0.0133  | 0.0196 |
| rs56873913 | rs10417980 | 0.953 | 4735  | 0.9481  | -0.065 | 0.763  | -0.0022 | 0.0342 |
| rs6065094  |            |       | 16119 | 0.9319  | 0.086  | 0.3341 | 0.0014  | 0.0167 |
| rs7267348  |            |       | 14000 | 0.1677  | -1.38  | 0.756  | -0.0272 | 0.0197 |
| rs1023500  |            |       | 13984 | 0.795   | -0.26  | 0.8176 | -0.0057 | 0.0219 |

1. Proxy used in SUNLIGHT; 2. R-squared value indicating linkage disequilibrium between variant in PGC and proxy; 3. Z-value from association test; 4. Effect allele frequency (EAF) corresponds to effect allele from Table S3; 5. Constructed beta value. Calculated as  $\text{Beta} = z\text{-score} / \sqrt{N} * 1 / \sqrt{\text{EAF}(1-\text{EAF})}$ . This calculation assumes that the standard errors are proportional to the inverse-square root of the sample size multiplied by the variance of the genetic variant as a random variable (variance =  $\text{EAF}(1-\text{EAF})$ ). This result should hold asymptotically; 6. Constructed standard error. Calculated as  $\text{Beta}/z\text{-score}$ .

**Table S5. Results from the fixed effects meta-analysis, likelihood approach and Egger**

|                             | <b>Beta<sup>1</sup></b> | <b>95% CI</b>   | <b>P-value</b> |
|-----------------------------|-------------------------|-----------------|----------------|
| Fixed effects meta-analysis | 0.051                   | (-0.006, 0.108) | 0.08           |
| Likelihood Approach         | 0.057                   | (-0.001, 0.114) | 0.05           |
| Egger regression- Intercept | -0.003                  | (-0.026,0.019)  | 0.79           |
| Egger regression- Slope     | 0.096                   | (-0.209, 0.401) | 0.54           |

1. Beta coefficients are constructed from z scores. Effect sizes are not interpretable.



**Figure S1. Mendelian randomization analysis of the effect of 25(OH)D on schizophrenia using SNPs related to 25(OH)D synthesis**

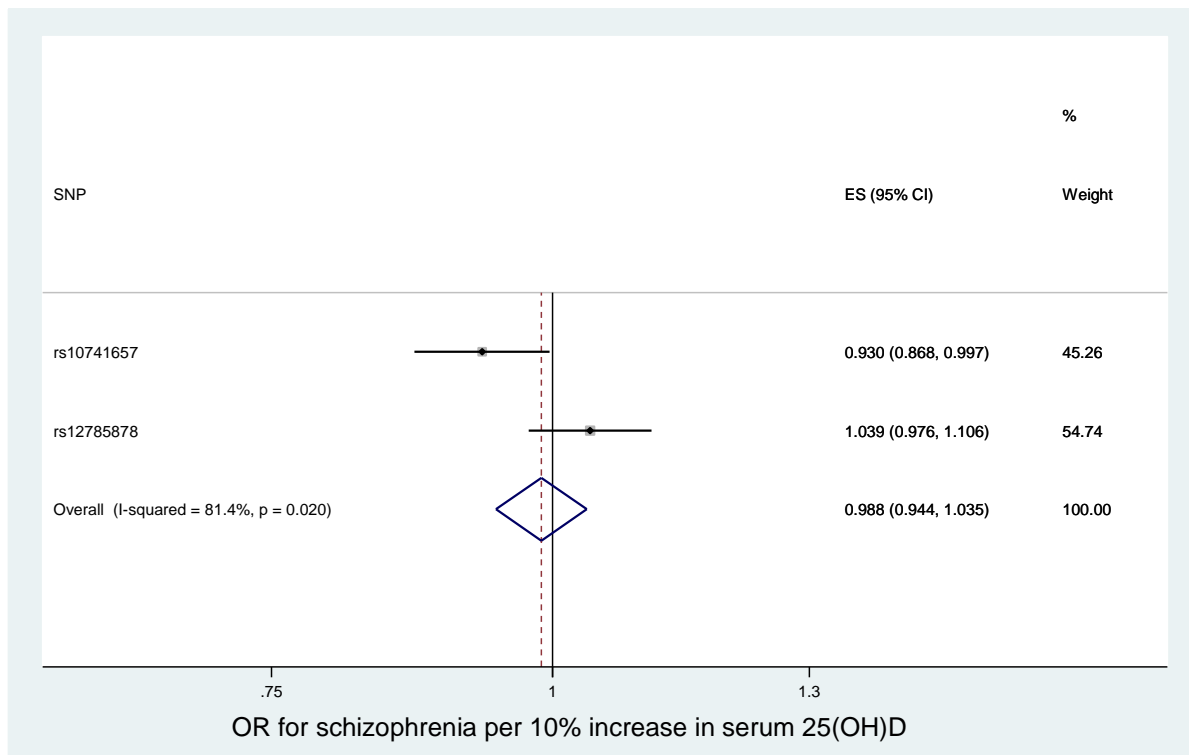

Results combined in inverse variance weighted fixed effects meta-analysis. The result from the likelihood approach was similar (OR: 0.987, 95% CI: 0.943, 1.034).

**Figure S2. Mendelian randomization analysis of the effect of 25(OH)D on schizophrenia using SNPs related to 25(OH)D metabolism**

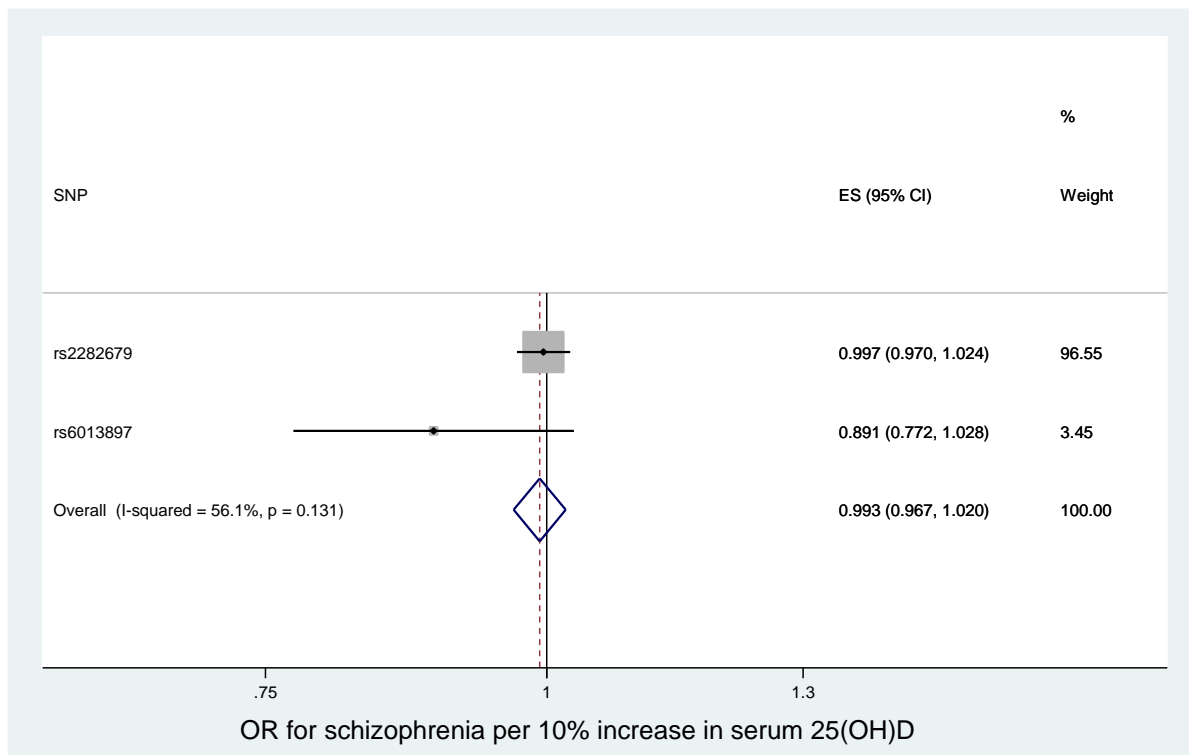

Results combined in inverse variance weighted fixed effects meta-analysis. The result from the likelihood approach was similar (OR: 0.993, 95% CI: 0.966, 1.019).

**Figure S3. Mendelian randomization analysis of the effect of 25(OH)D on schizophrenia excluding the GC SNP**

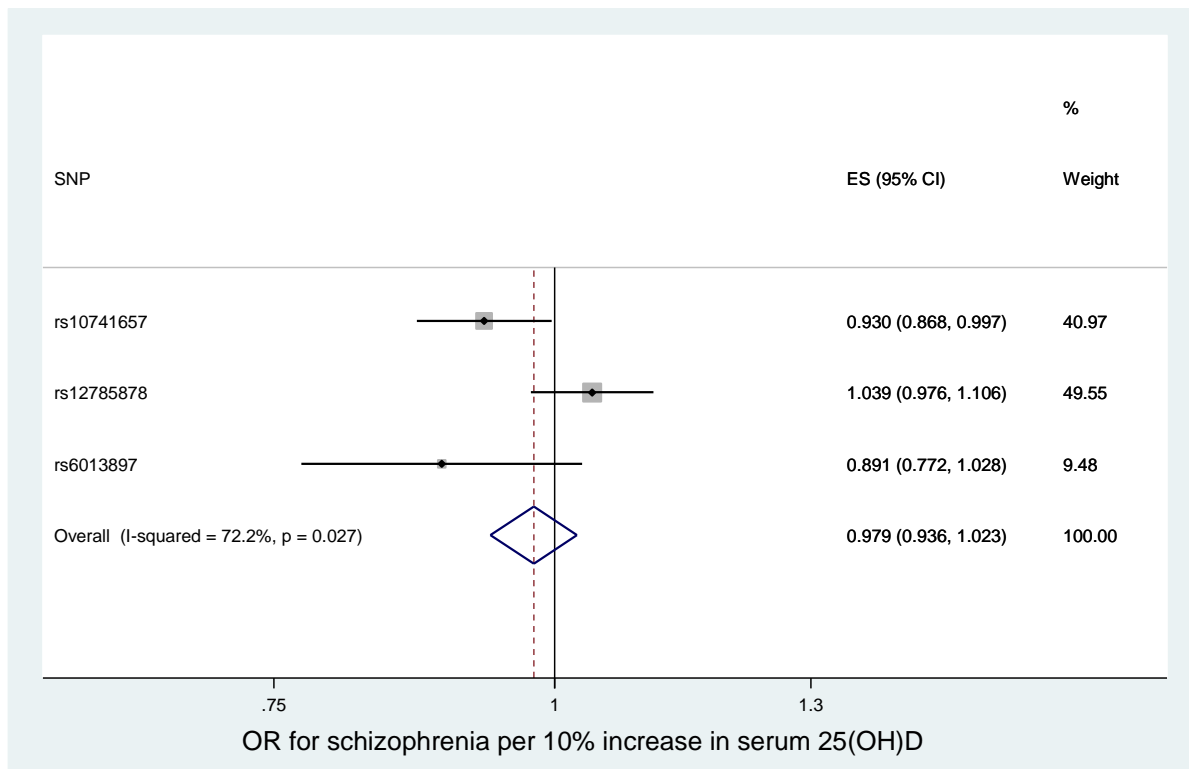

Results combined in inverse variance weighted fixed effects meta-analysis. The result from the likelihood approach was similar (OR: 0.977, 95% CI: 0.935, 1.021).

**Figure S4. Mendelian randomization analysis of the effect of 25(OH)D on schizophrenia excluding the *DHCR7* SNP**

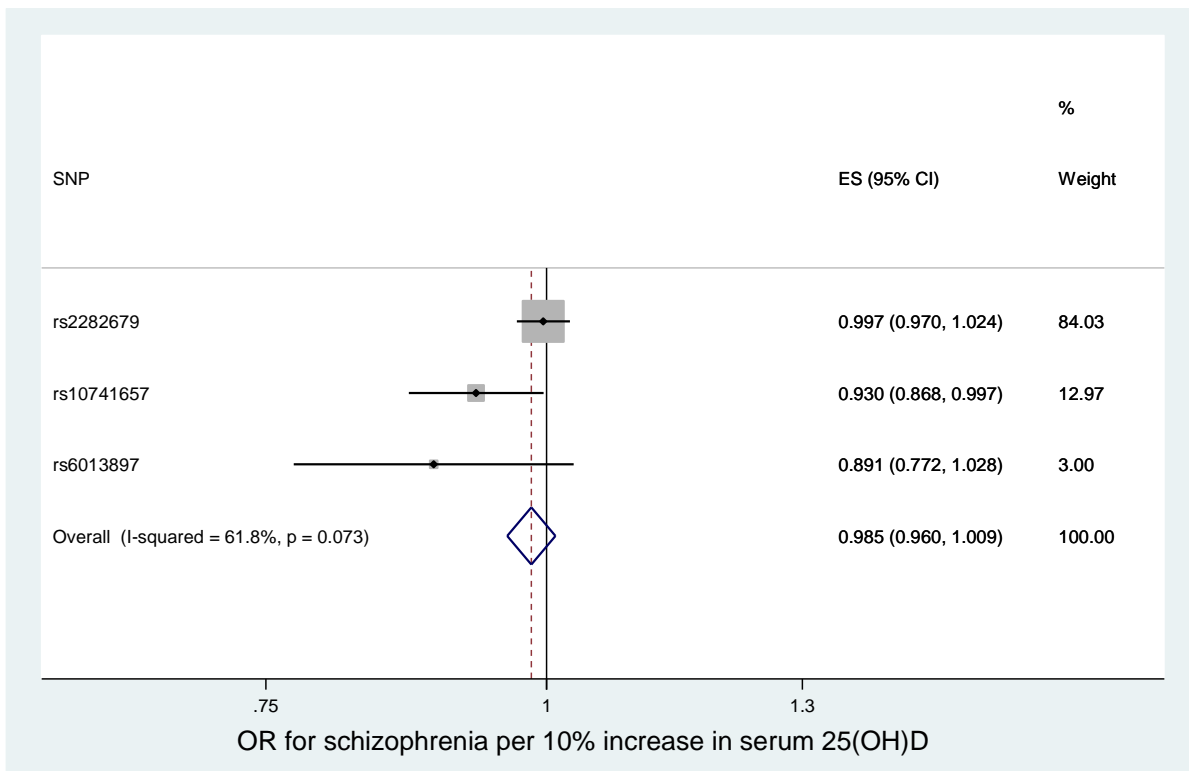

Results combined in inverse variance weighted fixed effects meta-analysis. The result from the likelihood approach was similar (OR: 0.984, 95% CI: 0.960, 1.009).
